# Supplementary material for: Livelihood vulnerability approach to assessing climate change impacts on mixed agro-livestock smallholders around the Gandaki River Basin in Nepal
Source: Springer Nature journal article supplement (doi:10.1007/s10113-015-0833-y), 2015-07-04
Supplement: MOESM1 [file 10113_2015_833_MOESM1_ESM.docx]

Table 1: Livelihood Vulnerability Index (LVI) sub-component values and minimum and maximum sub-component values for Dhading, Syangja and Kapilvastu of Nepal

| **Major components** | **Sub-components** | **Units** | **Dhading** | **Syangja** | **Kapilvastu** | **Max value** | **Min value** |
| --- | --- | --- | --- | --- | --- | --- | --- |
| 1. Socio-demographic profile | Percentage of dependent people (Dependent population: <15 years and >60 years) | Percent | 45.1 | 44.9 | 45.9 | 100 | 0 |
| Percentage of female headed household | Percent | 17.6 | 10.7 | 12.4 | 100 | 0 |
| Percentage of household head not attending school | Percent | 41.7 | 18.8 | 30.2 | 100 | 0 |
| 2. Livelihood Strategies | Percentage of household with family member not working outside their community for job | Percent | 52.6 | 42.9 | 47.5 | 100 | 0 |
| Average livestock diversification index | 1/(1 + #Species) | 0.2 | 0.3 | 0.3 | 0.5 | 0.1 |
| 3. Social network | Percentage of household not having access to communication medias (TV/Radio, Telephone) | Percent | 17.3 | 11.3 | 33.5 | 100 | 0 |
| Percentage of household not having access to local government service (Veterinary) | Percent | 51.9 | 27.0 | 10.9 | 100 | 0 |
| Percentage of household not having access to institution to purchase fodder seed/seedlings | Percent | 3.6 | 1.1 | 2.8 | 100 | 0 |
| Percentage of household not associated with any organization (Cooperative/group) | Percent | 6.7 | 3.4 | 1.7 | 100 | 0 |
| Average borrow: lend money ratio | Ratio | 1.1 | 1.1 | 1.2 | 2 | 0.5 |
| 4. Health | Average time to health facility | Minutes | 77.0 | 33.0 | 31.0 | 240 | 2 |
| Percentage of household with family member chronically illness | Percent | 25.1 | 36.0 | 47.8 | 100 | 0 |
| Percentage of household with a family member missing work in the last 2 weeks due to illness | Percent | 11.6 | 18.5 | 39.4 | 100 | 0 |
| 5. Food | Percentage of household depending solely on family farm for food | Percent | 53.4 | 33.1 | 71.2 | 100 | 0 |
| Percentage of household not saving seeds | Percent | 16.1 | 10.1 | 53.7 | 100 | 0 |
| Average number of month household struggling for food | Month | 3.0 | 5.0 | 2.0 | 12 | 0 |
| 6. Water | Percentage of household reporting water conflict in past one year | Percent | 29.3 | 27.5 | 21.0 | 100 | 0 |
| Average time to water source | Minutes | 49.0 | 40.0 | 2.0 | 180 | 1 |
| Percentage of household that do not have consistence water supply | Percent | 5.7 | 5.6 | 1.7 | 100 | 0 |
| 7. Natural Disaster | Average numbers of flood event in the past 10 years | Counts | 1.3 | 1.2 | 1.3 | 9 | 0 |
| Average numbers of landslide event in the past 10 years | Counts | 9.5 | 6.8 | 0.1 | 43 | 0 |
| Average numbers of drought event in the past 10 years | Counts | 6.2 | 4.3 | 6.9 | 12 | 0 |
| 8. Climate variability | Average number of consecutive dry days, 2002-2011 | Counts | 77.1 | 84.2 | 89.6 | 163 | 24 |
| Average number of consecutive wet days from 2002-2011 | Counts | 14.0 | 14.7 | 7.8 | 22 | 3 |
| Average number of warm days (Tmax>90th percentile), 2002-2011 | Counts | 44.0 | 25.0 | 31.0 | 98 | 2 |
| Average number of cold nights (Tmin<10th percentile), 2002-2011 | Counts | 20.0 | 13.0 | 22.0 | 50 | 4 |

**Table 2: Sub-component indices, major components, and overall LVI for Dhading, Syangja and Kapilvastu districts, Nepal**

| **Sub components** | **Dhading** | **Syangja** | **Kapilvastu** | **Major components** | **Dhading** | **Syangja** | **Kapilvastu** |
| --- | --- | --- | --- | --- | --- | --- | --- |
| Percentage of dependent people (Dependent population: <15 years and >60 years) | 0.4505 | 0.4490 | 0.4594 | Socio-demographic profile | 0.3478 | 0.2480 | 0.2951 |
| Percentage of female headed household | 0.1760 | 0.1070 | 0.1240 |
| Percentage of household head not attended school | 0.4170 | 0.1880 | 0.3020 |
| Percentage of household with family member not working outside their community for job | 0.5260 | 0.4290 | 0.4750 | Livelihood Strategies | 0.4378 | 0.4290 | 0.4750 |
| Average livestock diversification index | 0.3496 | 0.4910 | 0.5219 |
| Percentage of household not having access to communication medias (TV/Radio, Telephone) | 0.1730 | 0.1130 | 0.3350 | Social network | 0.1437 | 0.1179 | 0.1761 |
| Percentage of household not having access to local government service (Veterinary) | 0.0360 | 0.0110 | 0.0280 |
| Percentage of household not having access to institution to purchase fodder seed/seedlings | 0.0670 | 0.0340 | 0.0170 |
| Percentage of household that are not member of any organization (Cooperative/group) | 0.0670 | 0.0340 | 0.0170 |
| Average borrow: lend money ratio | 0.3753 | 0.3973 | 0.4833 |
| Average time to health facility | 0.3151 | 0.1303 | 0.1218 | Health | 0.2274 | 0.2251 | 0.3313 |
| Percentage of household with family member chronically illness | 0.2510 | 0.3600 | 0.4780 |
| Percentage of household with a family member had to miss work in the last 2 weeks due to illness | 0.1160 | 0.1850 | 0.3940 |
| Percentage of household depend solely on family farm for food | 0.5340 | 0.3310 | 0.7120 | Food | 0.3150 | 0.2829 | 0.4719 |
| Percentage of household that do not save seeds | 0.1610 | 0.1010 | 0.5370 |
| Average number of month household struggle for food | 0.2500 | 0.4167 | 0.1667 |
| Percentage of household reporting water conflict in past one year | 0.2930 | 0.2750 | 0.2100 | Water | 0.2061 | 0.1830 | 0.0775 |
| Average time to water source | 0.2682 | 0.2179 | 0.0056 |
| Percentage of household that do not have consistent water supply | 0.0570 | 0.0560 | 0.0170 |
| Average numbers of flood event in the past 10 years | 0.1444 | 0.1333 | 0.1444 | Natural Disaster | 0.2940 | 0.2166 | 0.2406 |
| Average numbers of landslide events in the past 10 years | 0.2209 | 0.1581 | 0.0023 |
| Average numbers of drought event in the past 10 years | 0.5167 | 0.3583 | 0.5750 |
| Average number of consecutive dry days from 2002 to 2011 | 0.3820 | 0.4331 | 0.4721 | Climate variability | 0.4366 | 0.3710 | 0.3539 |
| Average number of consecutive wet days from 2002 to 2011 | 0.5789 | 0.6158 | 0.2500 |
| Average number of warm days (Tmax>90th percentile) | 0.4375 | 0.2396 | 0.3021 |
| Average number of cold nights (Tmin<10th percentile) | 0.3478 | 0.1957 | 0.3913 |
| **Overall LVI:**  **Dhading: 0.2889 Syangja: 0.2461 Kapilvastu: 0.2883** | | | | | | | |
